# Supplementary material for: The Effects of Silencing PTX3 on the Proteome of Human Endothelial Cells
Source: MDPI journal article supplement (doi:10.3390/ijms232113487), 2022-11-03
Supplement: s1 [file s1]

**Table S1.** Functional enrichments of Biological Processes in the network created by STRING with the proteins more abundant in PTX3 silenced cells.

| #Term ID   | Term description               | Observed gene count | Background gene count | Strength | False discovery rate | Matching proteins in your network (labels) |
|------------|--------------------------------|---------------------|-----------------------|----------|----------------------|--------------------------------------------|
| GO:0000398 | mRNA splicing, via spliceosome | 6                   | 294                   | 1.24     | 0.0128               | SRSF9, SNRPC, U2AF2, PSPC1, SNRPB, ALYREF  |
| GO:0045765 | Regulation of angiogenesis     | 6                   | 303                   | 1.23     | 0.01280              | GRN, ITGA5, ATP2B4, EPHA2, ENG, ANXA1      |
| GO:0001649 | Osteoblast differentiation     | 4                   | 127                   | 1.43     | 0.0254               | CCDC47, EPHA2, RRBP1, ALYREF               |
