# Supplementary material for: The Effects of Silencing PTX3 on the Proteome of Human Endothelial Cells
Source: MDPI journal article supplement (doi:10.3390/ijms232113487), 2022-11-03
Supplement: s1 [file s1]

Lanes 3/4 have been cropped for Fig. 3a (KDR).  
Lanes 1 to 8 have been used for quantification (Fig. 3b).

| siRNA | Ctrl | PTX3 | Ctrl | PTX3 | Ctrl | PTX3 | Ctrl | PTX3 |
|-------|------|------|------|------|------|------|------|------|
|-------|------|------|------|------|------|------|------|------|

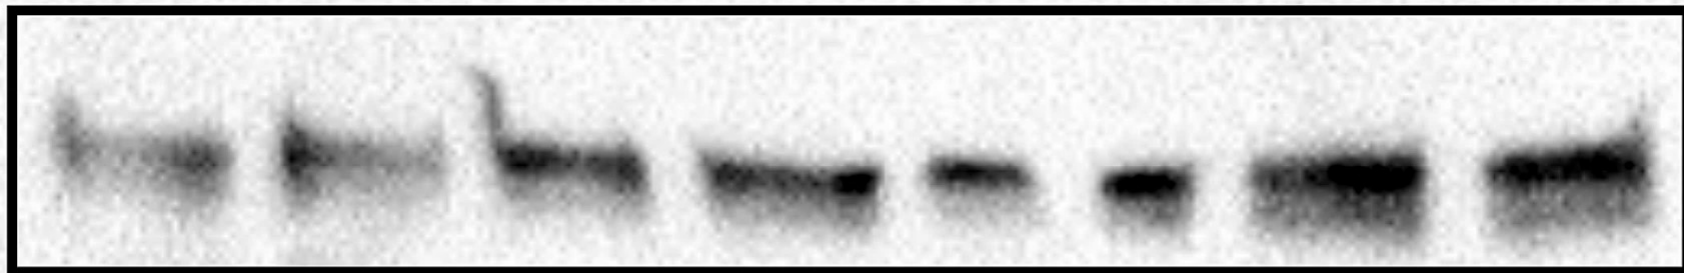

|   |   |   |   |   |   |   |   |
|---|---|---|---|---|---|---|---|
| 1 | 2 | 3 | 4 | 5 | 6 | 7 | 8 |
|---|---|---|---|---|---|---|---|

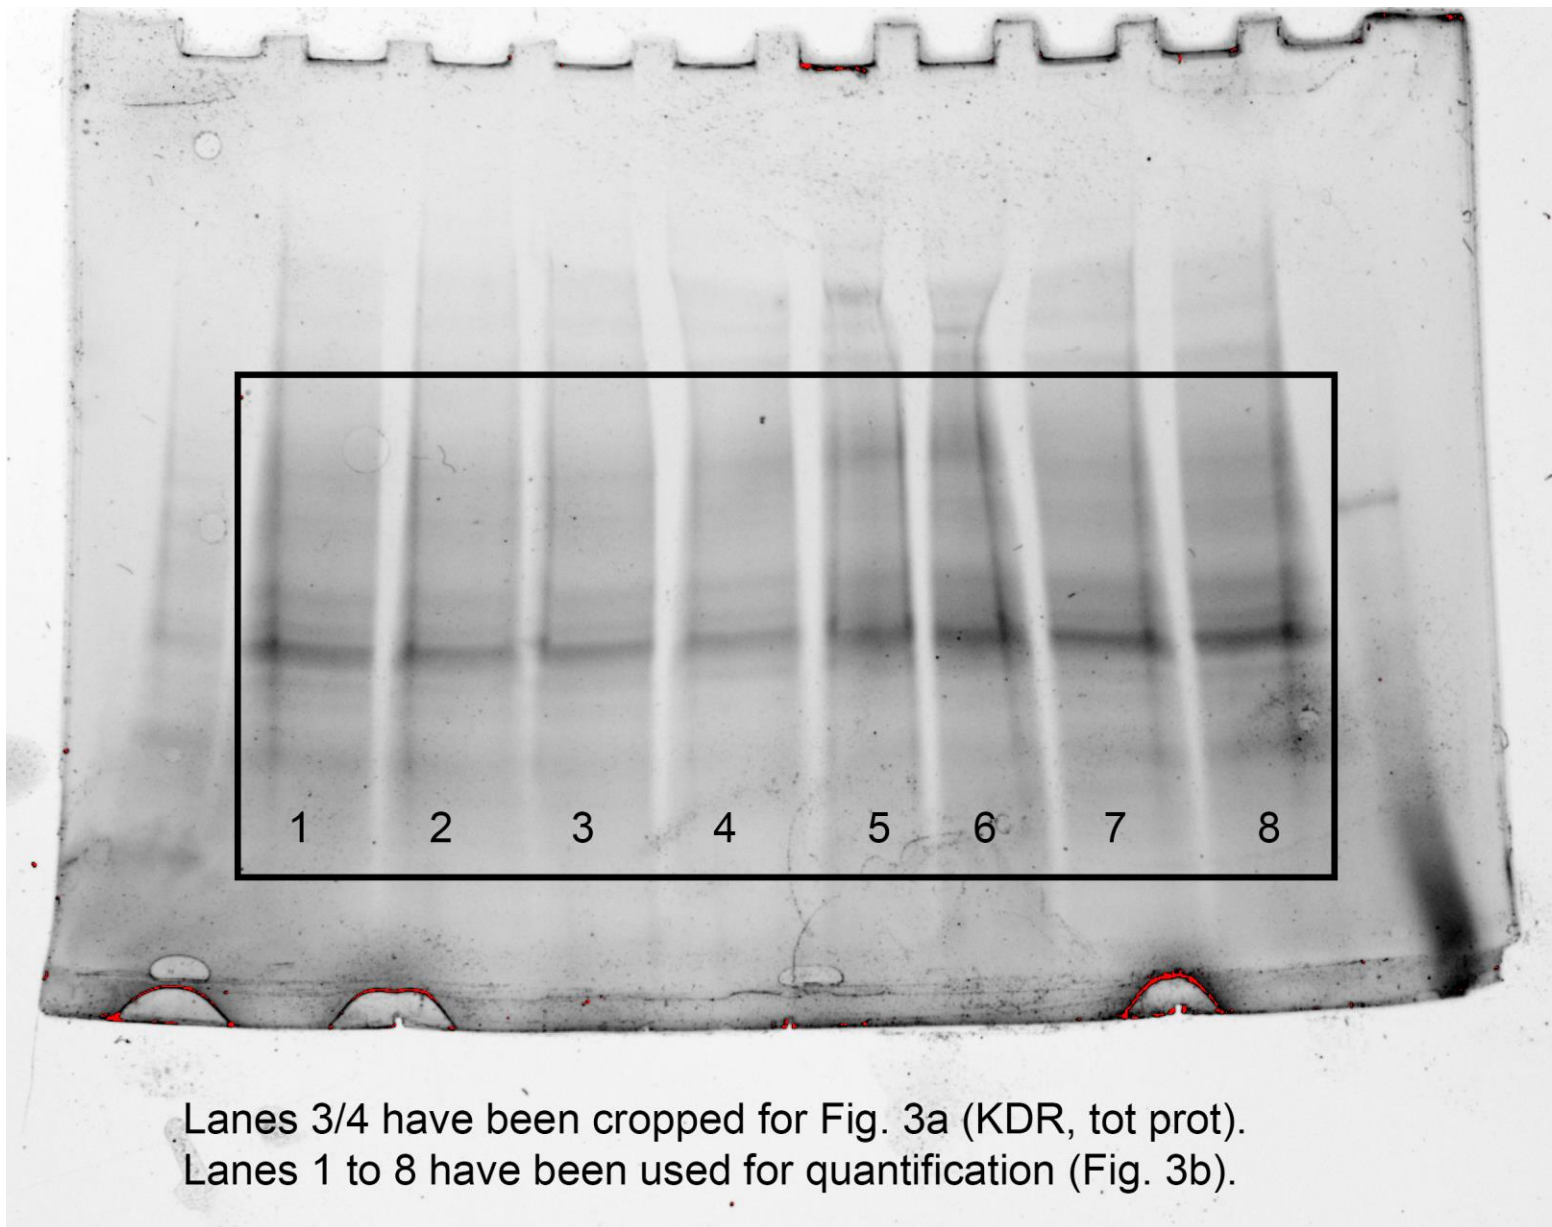

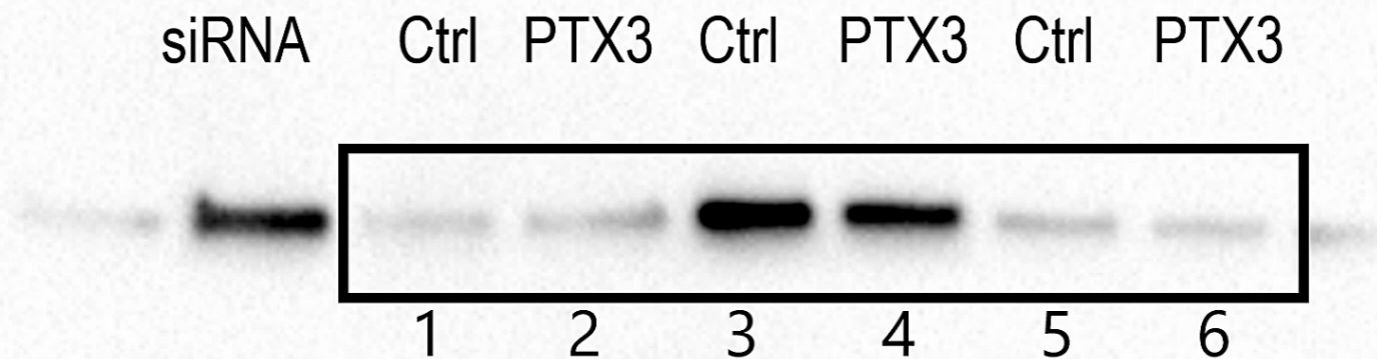

Lanes 3/4 have been cropped for Fig. 3a (eNOS).  
Lanes 1 to 6 have been used for quantification (Fig. 3b).



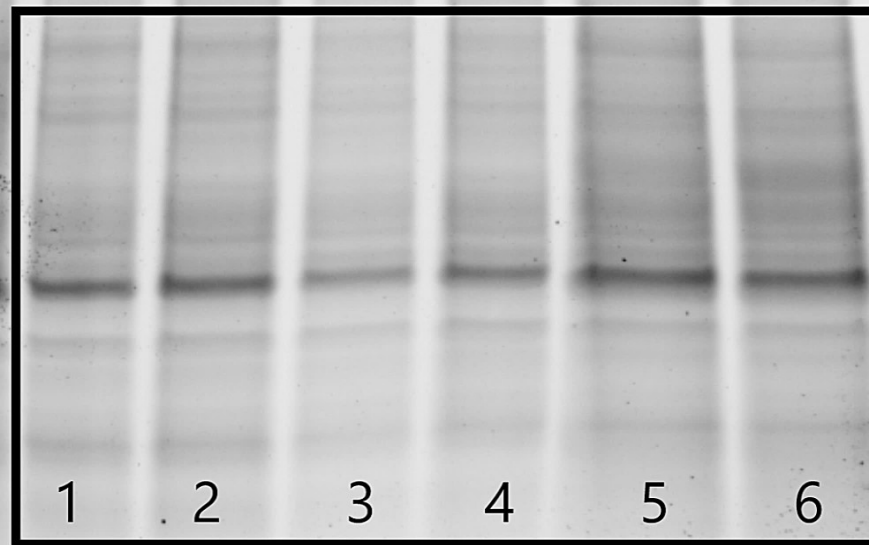

Lanes 3/4 have been cropped for Fig. 3a (eNOS, tot prot).  
Lanes 1 to 6 have been used for quantification (Fig. 3b).
