# Supplementary material for: The Effects of Silencing PTX3 on the Proteome of Human Endothelial Cells
Source: MDPI journal article supplement (doi:10.3390/ijms232113487), 2022-11-03
Supplement: s1 [file s1]

**Table S2.** List of primers for human genes. For custom primers, forward and reverse sequences are reported. For commercially available primers, the Qiagen codes are indicated.

| Gene         | Sequences                                                                   |
|--------------|-----------------------------------------------------------------------------|
| GAPDH        | Forward: ACG GAT TTG GTC GTA TTG GGC<br>Reverse: CTC CTG GAA GAT GGT GAT GG |
| PTX3         | Forward: TGC GAT TCT GTT TTG TGC TC<br>Reverse: TGA AGA GCT TGT CCC ATT CC  |
| EPHA2        | QT00028595                                                                  |
| ENG          | QT00013335                                                                  |
| PTGS1/COX-1  | QT00210280                                                                  |
| IL1- $\beta$ | QT00021385                                                                  |
| IL-6         | QT00083720                                                                  |
| MCP-1        | QT00212730                                                                  |
